# Supplementary material
Source: publisher figshare collection journal article supplement (https://gsapubs.figshare.com/ndownloader/files/22411404)

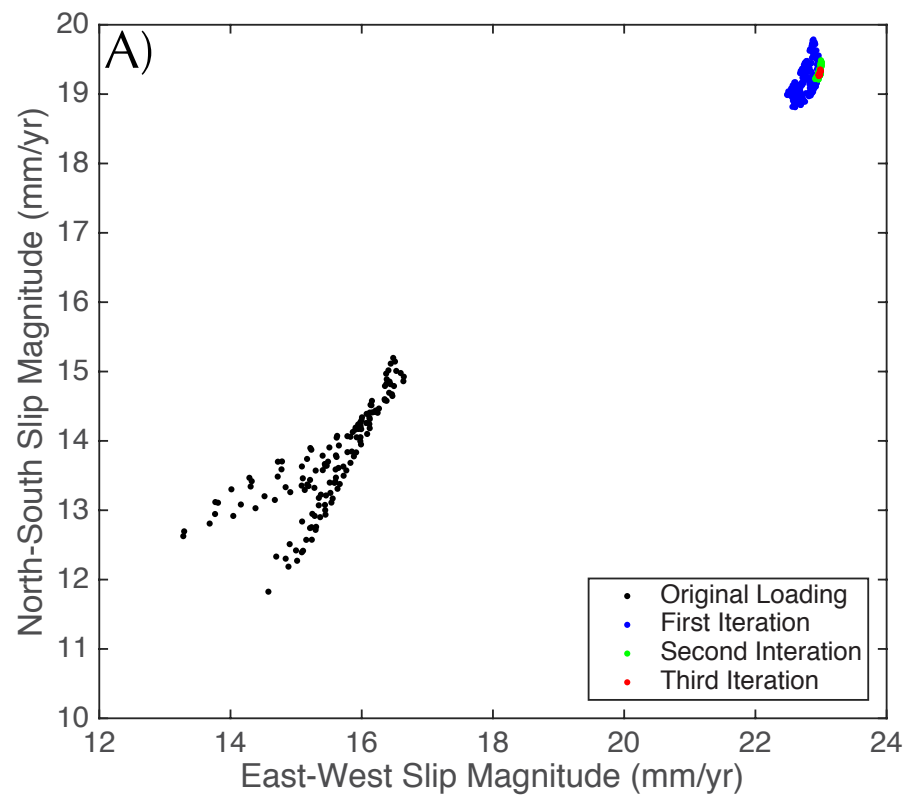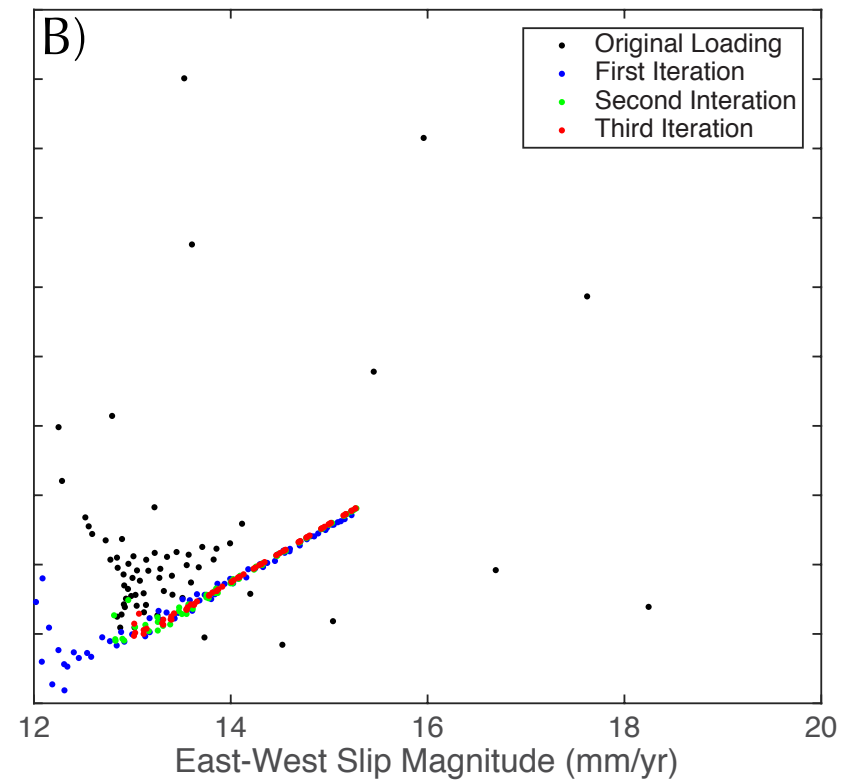

Supplement: Supplementary file 1 [file 22411404]

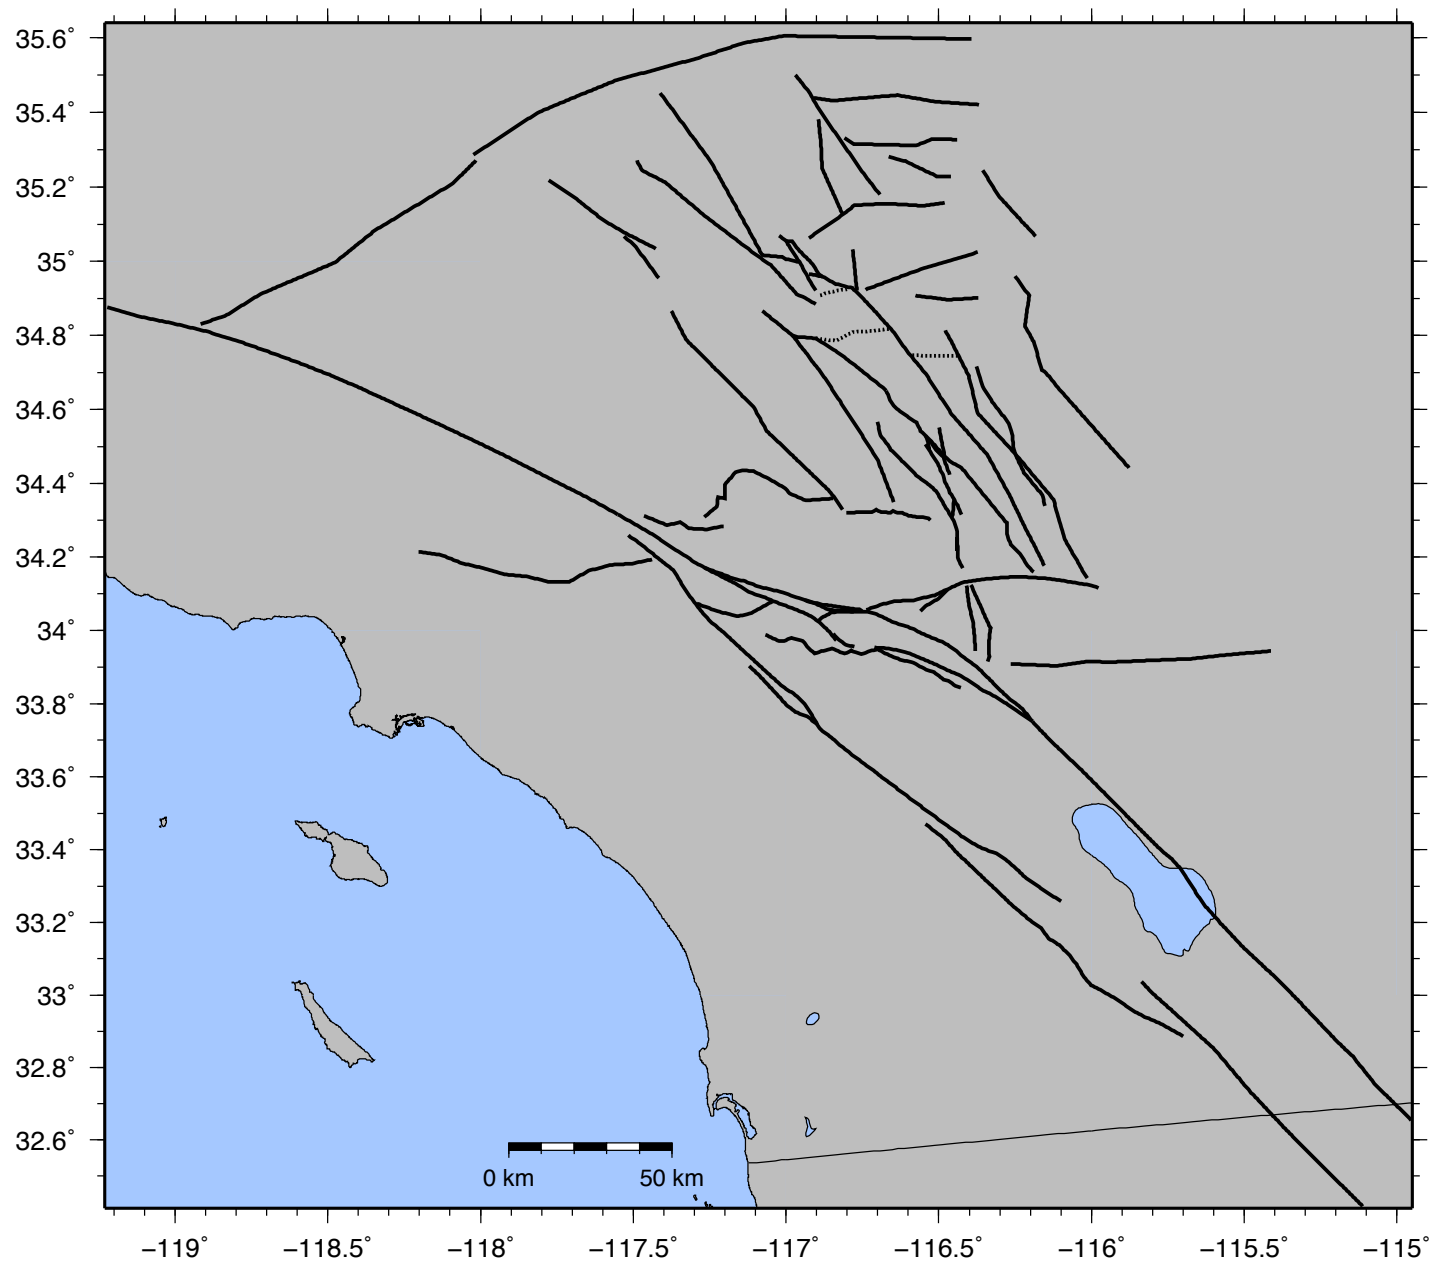

Supplement: Supplementary file 2 [file 22411404]
